# Supplementary material
Source: Elsevier journal article supplement (https://www.sciencedirect.com/science/article/pii/S0301054620300872)
Supplement: mmc1 [file S0301054620300872:mmc1.docx]

Appendix 1. List of visited online pharmacies in our study.

**Polish market:** We selected the most popular online drugstores based on the Gemini report on “E-commerce in Poland 2017” Geminus for E-commerce Poland.

https://www.gemius.pl/wszystkie-artykuly-aktualnosci/leki-sprawdzamy-w-sieci-kupujemy-tradycyjnie.html

**Spanish market:** We used the most popular pharmacies as stated on the website: https://www.esdemarketing.com/mejores-farmacias-online/.

| **Polish on-line drugstores** | **Spanish on-line drugstores** |
| --- | --- |
| https://doz.pl | https://www.mifarma.es |
| https://aptekagemini.pl | https://www.dosfarma.com |
| https://ziko.pl | https://mifarmaciaonline.es |
| https://apteka-melissa.pl | https://www.promofarma.com/es |
| https://cefarm24.pl | https://www.farmavazquez.com |
