# Supplementary material
Source: Elsevier journal article supplement (https://www.sciencedirect.com/science/article/pii/S0301054620300872)
Supplement: mmc2 [file S0301054620300872:mmc2.docx]

Appendix 2. Haptens based on the European Baseline Series, the Fragrance Series and the Cosmetic series.

List of haptens that comprise the European Baseline Series, the Fragrance Series and the Cosmetic series, taken from: https://www.chemotechnique.se.

| **European Baseline Series** | **Fragrance Series** | **Cosmetic Series** |
| --- | --- | --- |
| | Potassium dichromate | | --- | | p-phenylenediaine (PPD) | | Thiuram mix | | Neomycin sulfate | | Cobalt(II)chloride hexahydrate | | Caine mix III | | Nickel(II)sulfate hexahydrate | | 2-Hydroxyethyl methacrylate | | Colophonium | | Paraben mix | | N-Isopropyl-N-phenyl-4-phenylenediamine (IPPD) | | Lanolin alcohol | | Mercapto mix | | Epoxy resin, Bisphenol A | | Peru balsam | | 4-tert-Butylphenolformaldehyde resin (PTBP) | | 2-Mercaptobenzothiazole (MBT) | | Formaldehyde | | Fragrance mix I | | Sesquiterpene lactone mix | | Quaternium-15 | | Propolis | | Methylisothiazolinone+ Methylchloroisothiazolinone | | Budesonide | | Tixocortol-21-pivalate | | Methyldibromo glutaronitrile | | Fragrance mix II | | Hydroxyisohexyl 3-cyclohexene carboxaldehyde | | Methylisothiazolinone | | Textile dye mix | |  | | | Cinnamal | | --- | | Cinnamyl alcohol | | Amyl cinnamal | | Eugenol | | Isoeugenol | | Geraniol | | Oakmoss absolute | | Hydrocitronellal | | Narcissus poeticus absolute | | Musk xylene | | Methyl anthranilate | | Musk moskene | | Musk ketone | | Jasmine synthetic | | Benzyl salicylate | | Benzyl alcohol | | Vanillin | | Lavender absolute | | Cananga oil | | Rose absolute | | Ylang ylang oil | | Geranium oil | | Jasmine absolute | | Sandalwood oil | | Hydroxyisohexyl 3-cyclohexene carboxaldehyde | | Citral | | Farnesol | | Citronellol | | Hexyl cinnamic aldehyde | | Courmarin | | Fragrance mix II | | Amyl cinnamyl alcohol | | Anise alcohol | | Benzyl benzoate | | Benzyl cinnamate | | Butylphenyl methylpropional | | Treemoss absolute | | alfa-Isomethyl ionone | | D-Limonene | | Linalool | | Methyl-2-octynoate | | Majanthole | | Hydroperoxides of Linalool | | Hydroperoxides of Limonene | | Perfume mix | | Hydroperoxides of Linalool | | Hydroperoxides of Limonene | | Styrax | | | Isopropyl myristate | | --- | | Amerchol L-101 | | Triethanolamine | | Polysorbate 80 | | Sorbitan oleate | | 2-tert-butyl-4-methoxyphenol (BHA) | | BHT | | Octyl gallate | | Triclosan | | Sorbic acid | | p-chloro-m-cresol | | Chloroxylenol (PCMX) | | Thimerosal | | Imidazolidynyl urea | | Methenamine | | Chlorohexidine digluconate | | Paraben mix | | Phemyl mercuric acetate | | Chloroacetamide | | Hexahydro-1,3,5-tris-(2-hydroxyethyl) triazine | | Clioquinol | | Ethylenediamine dihydrochloride | | Hydroabietyl alcohol | | Phenyl salicylate | | Benzophenone-3 | | Sorbitan sesquioleate | | Propylene glycol | | Stearyl alcohol | | Cetyl alcohol | | Benzyl salicylate | | 2-bromo-2-nitropropane-1,3-diol | | Sodium-2-pyridinethiol-1-oxide | | Cocamidopropyl betaine | | Benzyl alcohol | | Methylisothiazolinone+ Methylchloroisothiazolinone | | t-butyl hydroquinone | | Drometriazole | | Propyl Gallate | | Dodecyl Gallate | | Quaternium-15 | | Phenoxyethanol | | Diazolidinyl urea | | Tocopherol | | DMDM Hydantoin | | Methyldibromo glutaronitrile | | Tea Tree Oil oxidized | | Iodopropynyl butylcarbamate | | 3-(Dimethylamino)-1-propylamine | | Lauryl polyglucose | | Peppermint oil | | Shellac | | Tocopheryl acetate | | Turpentine oil oxidized | | Methylisothiazolinone | | Musk mix | | Oleamidopropyl dimethylamine | | Decyl glucoside | | Ethylhexylglycerin | | Sodium metabisulfite | | Gallate mix | | Cetearyl glucoside | | Panthenol | | Polyaminopropyl biguanide | |
